# Supplementary material for: Intralesional SD-101 in Combination with Pembrolizumab in Anti-PD-1 Treatment-Naïve Head and Neck Squamous Cell Carcinoma: Results from a Multicenter, Phase II Trial
Source: PubMed Central journal article supplement — Clin Cancer Res. 2022 Mar 14;28(6):1157–66. doi: 10.1158/1078-0432.CCR-21-1411 (PMC9365346; doi:10.1158/1078-0432.ccr-21-1411), 2022-03-14

# Supplementary figures and tables.

Supplementary Figure 1: Subject response history and current status by dose group.

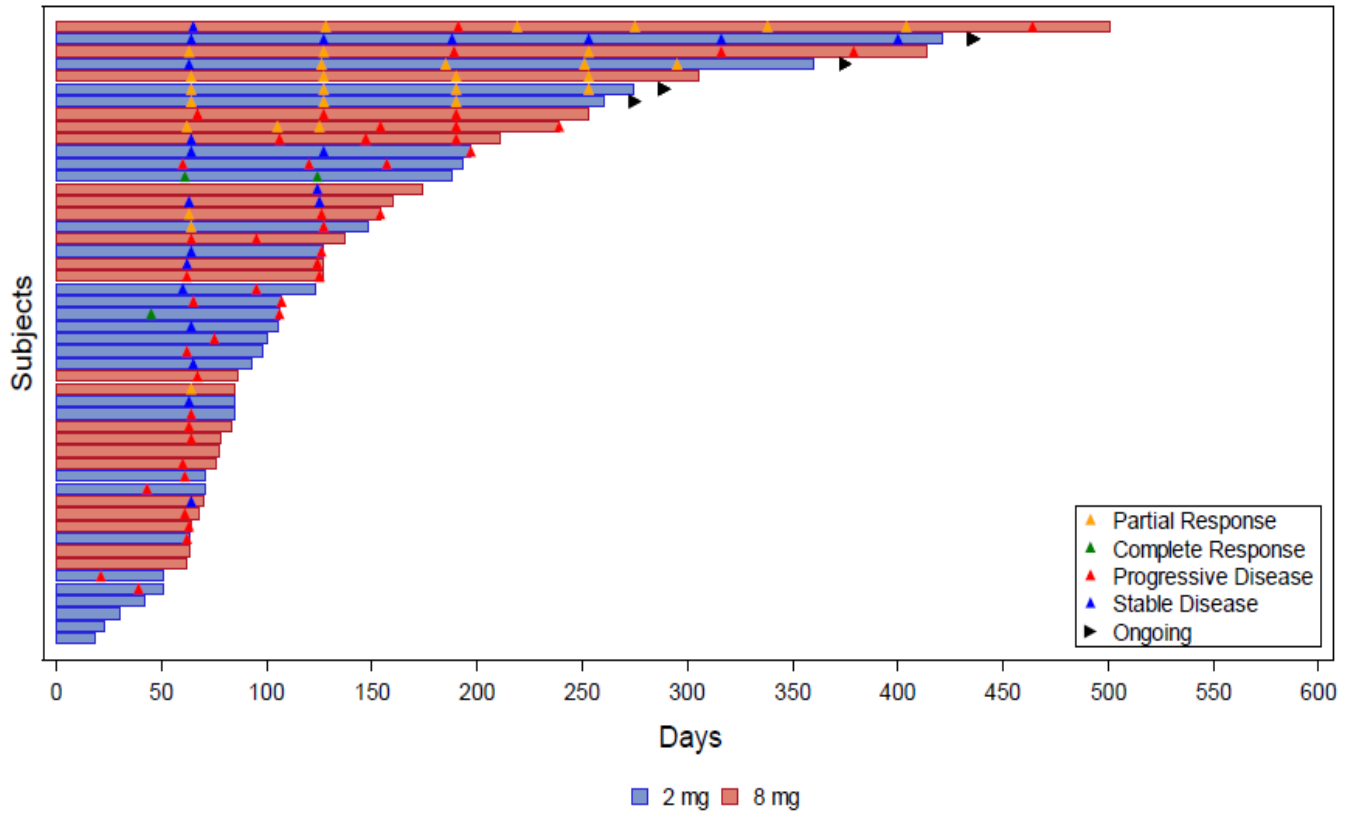

Supplement: ccr-21-1411_supplementary_figure_1_supp1.pdf [file ccr-21-1411_supplementary_figure_1_supp1.pdf]
