# Supplementary material for: Intralesional SD-101 in Combination with Pembrolizumab in Anti-PD-1 Treatment-Naïve Head and Neck Squamous Cell Carcinoma: Results from a Multicenter, Phase II Trial
Source: PubMed Central journal article supplement — Clin Cancer Res. 2022 Mar 14;28(6):1157–66. doi: 10.1158/1078-0432.CCR-21-1411 (PMC9365346; doi:10.1158/1078-0432.ccr-21-1411), 2022-03-14
Supplement: ccr-21-1411_supplementary_table_1_supptables1.pdf [file ccr-21-1411_supplementary_table_1_supptables1.pdf]

Supplementary Table 1: Efficacy based on baseline tumor characteristics.

|                                                 |                  | <b>2 mg<br/>(n = 28)</b> | <b>8 mg<br/>(n = 23)</b> | <b>Total<br/>(n = 51)</b> |
|-------------------------------------------------|------------------|--------------------------|--------------------------|---------------------------|
| <i>Stage at screening</i>                       | Metastatic       | 3/16 (18.8%)             | 5/14 (35.7%)             | 8/30 (26.7%)              |
|                                                 | Local recurrence | 0/2 (0.0%)               | 0/2 (0.0%)               | 0/4 (0.0%)                |
|                                                 | Both             | 3/10 (30.0%)             | 1/7 (14.3%)              | 4/17 (23.5%)              |
| <i>Primary Tumor Location</i>                   | Oropharyngeal    | 2/9 (22.2%)              | 2/2 (100.0%)             | 4/11 (36.4%)              |
|                                                 | Oral             | 2/13 (15.4%)             | 1/13 (7.7%)              | 3/26 (11.5%)              |
|                                                 | Laryngeal        | 2/3 (66.7%)              | 2/4 (50.0%)              | 4/7 (57.1%)               |
|                                                 | Nasopharyngeal   | -                        | 0/3 (0.0%)               | 0/3 (0.0%)                |
|                                                 | Hypopharyngeal   | 0/2 (0.0%)               | -                        | 0/2 (0.0%)                |
| <i>Anatomical location of secondary lesions</i> | Liver            | 0/2 (0.0%)               | 0/2 (0.0%)               | 0/4 (0.0%)                |
|                                                 | Other visceral   | 2/8 (25.0%)              | 3/7 (42.9%)              | 5/15 (33.3%)              |
|                                                 | Non-visceral     | 4/17 (23.5%)             | 3/14 (21.4%)             | 7/31 (22.6%)              |
| <i>Prior Lines of Therapy, x/n (%)</i>          | 0                | 3/9 (33.3%)              | 1/3 (33.3%)              | 4/12 (33.3%)              |
|                                                 | 1                | 2/15 (13.3%)             | 2/11 (18.2%)             | 4/26 (15.4%)              |
|                                                 | 2                | 1/3 (33.3%)              | 2/6 (33.3%)              | 3/9 (33.3%)               |
|                                                 | 3+               | 0/1 (0.0%)               | 1/3 (33.3%)              | 1/4 (25.0%)               |
| <i>PD-L1 expression</i>                         | ≥ 20             | 4/11 (36.4%)             | 0/4 (0.0%)               | 4/15 (26.7%)              |
|                                                 | ≥ 1 to < 20      | 2/16 (12.5%)             | 6/19 (31.6%)             | 8/35 (22.9%)              |
|                                                 | < 1              | -                        | -                        | -                         |
| <i>HPV Status</i>                               | Positive         | 3/10 (30.0%)             | 4/6 (66.7%)              | 7/16 (43.8%)              |
|                                                 | Negative         | 2/11 (18.2%)             | 0/6 (0.0%)               | 2/17 (11.8%)              |
|                                                 | Unknown          | 1/7 (14.3%)              | 2/11 (18.2%)             | 3/18 (16.7%)              |
| <i>Prior cetuximab exposure</i>                 | Yes              | 0/3 (0%)                 | 1/9 (11.1%)              | 1/12 (8.3%)               |
|                                                 | No               | 6/20 (30.0%)             | 5/11 (45.5%)             | 11/31 (35.5%)             |
