# Supplementary material for: Intralesional SD-101 in Combination with Pembrolizumab in Anti-PD-1 Treatment-Naïve Head and Neck Squamous Cell Carcinoma: Results from a Multicenter, Phase II Trial
Source: PubMed Central journal article supplement — Clin Cancer Res. 2022 Mar 14;28(6):1157–66. doi: 10.1158/1078-0432.CCR-21-1411 (PMC9365346; doi:10.1158/1078-0432.ccr-21-1411), 2022-03-14
Supplement: ccr-21-1411_supplementary_table_2_supptables2.pdf [file ccr-21-1411_supplementary_table_2_supptables2.pdf]

Supplementary Table 2. ORR by location of injected lesion by dose. The highest response rate was in patients who had lesions in lymph nodes injected. While data on HPV status were incomplete, response in nodes was not associated with positive HPV status.  
 ORR by location of injected lesion.

|              | 2 mg | 8 mg | Total      |
|--------------|------|------|------------|
| Head         | 0/4  | 1/5  | 1/9 (11%)  |
| Neck         | 1/5  | 0/5  | 1/10 (10%) |
| Lymph node   | 4/13 | 4/9  | 8/22 (36%) |
| Skin         | 1/2  | 1/4  | 2/6 (33%)  |
| subcutaneous | 1/4  | 0/2  | 1/6 (17%)  |
